# Supplementary figures and images for: Feather Biodegradation For Feather Protein Lysate/ Feather Meal Mutual Formations: Optimization Using Crude YNDH Protease/Keratinase; Enzyme Partial Purification and Characterization
Source: Research Square preprint supplement (doi:10.21203/rs.3.rs-138223/v1), 2021-01-29

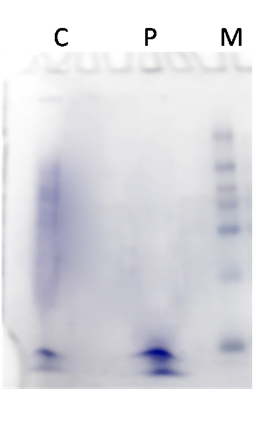

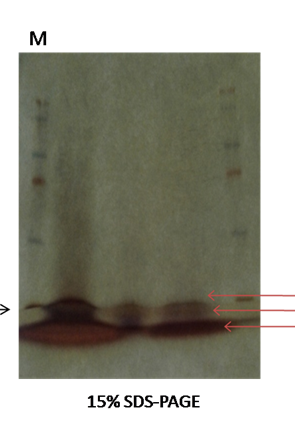

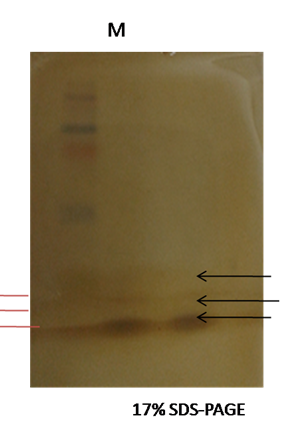

Supplement: Supplementary file 1 [file a181832c46421846f92ac8d9.docx]
